# Supplementary material for: White Blood Cell and C-Reactive Protein Levels Are Similar in Obese Hispanic White Women Reporting Adherence to a Healthy Plant, Unhealthy Plant, or Animal-Based Diet, unlike in Obese Non-Hispanic White Women
Source: MDPI journal article supplement (doi:10.3390/nu16040556), 2024-02-17
Supplement: s1 [file s1]

Table S1: WBC Table

|                                | Non-Hispanic<br>N (Weighted N) | Hispanic<br>N (Weighted N) |
|--------------------------------|--------------------------------|----------------------------|
| Healthy Plant – Mean (SE)      | 7.27 (0.26)                    | 8.52 (0.32)                |
| Less Healthy Plant – Mean (SE) | 7.91 (0.07)                    | 8.34 (0.11)                |
| Animal – Mean (SE)             | 8.58 (0.34)                    | 8.18 (0.41)                |

Table S2: WBC Comparisons

|                                      | Within             | Difference   | P-Value |
|--------------------------------------|--------------------|--------------|---------|
| Healthy Plant vs. Less Healthy Plant | Hispanic           | 0.17 (0.33)  | 0.9949  |
| Healthy Plant vs. Animal             | Hispanic           | 0.34 (0.54)  | 0.9876  |
| Less Healthy Plant vs. Animal        | Hispanic           | 0.17 (0.43)  | 0.9987  |
| Healthy Plant vs. Less Healthy Plant | Non-Hispanic       | -0.64 (0.26) | 0.1507  |
| Healthy Plant vs. Animal             | Non-Hispanic       | -1.31 (0.39) | 0.0174  |
| Less Healthy Plant vs. Animal        | Non-Hispanic       | -0.67 (0.34) | 0.3838  |
| Hispanic vs. Non-Hispanic            | Healthy Plant      | 1.25 (0.41)  | 0.0381  |
| Hispanic vs. Non-Hispanic            | Less Healthy Plant | 0.43 (0.14)  | 0.0317  |
| Hispanic vs. Non-Hispanic            | Animal             | -0.40 (0.44) | 0.9411  |

Table S3: CRP Table

|                                | Non-Hispanic | Hispanic    |
|--------------------------------|--------------|-------------|
| Healthy Plant – Mean (SE)      | 0.55 (0.12)  | 0.62 (0.07) |
| Less Healthy Plant – Mean (SE) | 0.69 (0.03)  | 0.78 (0.04) |
| Animal – Mean (SE)             | 1.17 (0.14)  | 0.66 (0.12) |

Table S4: CRP – Comparisons

|                                      | Within             | Difference   | P-Value |
|--------------------------------------|--------------------|--------------|---------|
| Healthy Plant vs. Less Healthy Plant | Hispanic           | -0.16 (0.08) | 0.2737  |
| Healthy Plant vs. Animal             | Hispanic           | -0.04 (0.14) | 0.9997  |
| Less Healthy Plant vs. Animal        | Hispanic           | 0.13 (0.13)  | 0.9221  |
| Healthy Plant vs. Less Healthy Plant | Non-Hispanic       | -0.14 (0.12) | 0.8579  |
| Healthy Plant vs. Animal             | Non-Hispanic       | -0.62 (0.15) | 0.0020  |
| Less Healthy Plant vs. Animal        | Non-Hispanic       | -0.48 (0.14) | 0.0126  |
| Hispanic vs. Non-Hispanic            | Healthy Plant      | 0.07 (0.14)  | 0.9956  |
| Hispanic vs. Non-Hispanic            | Less Healthy Plant | 0.09 (0.05)  | 0.5428  |
| Hispanic vs. Non-Hispanic            | Animal             | -0.51 (0.19) | 0.0855  |
